# Supplementary material for: Western Diet Consumption During Development: Setting the Stage for Neurocognitive Dysfunction
Source: Front Neurosci. 2021 Feb 10;15:632312. doi: 10.3389/fnins.2021.632312 (PMC7902933; doi:10.3389/fnins.2021.632312)
Supplement: Supplementary file 1 [file Table_1.XLSX]

## Sheet: Table 1
Table 1. Maternal and adolescent obesogenic diets on anxiety-like behavior, learning and memory, reward-motivated behavior, and social behavior in rodents. Legend: PN = postnatal day, CTL diet = control diet, HFD = high fat diet, CAF = cafeteria diet, EPM = elevated plus maze, OF = open field, NOR = novel object recognition, NOL = novel object location, MWM = Morris Water Maze, COA = conditioned …
Stage of Development	Cognitive Domain	Publication	Subjects	Experimental Diet	Diet Duration	Time of Test	Behavioral Test	Result
Prenatal/ Perinatal	Anxiety-like behavior	Bilbo and Tsang, 2010	Sprague-Dawley rat Harlan (Indianapolis, IN, USA) Dams (60 days old) Male & female offspring	Dams: High‐saturated‐fat diet: 20% of calories from protein, 20% from carbohydrate, and 60% from fat (95:5% lard:soybean oil); Research Diets D12492; New Brunswick, NJ or High‐trans‐fat diet : 20% protein, 20% carbohydrate, and 60% fat (95:5% Primex [Crisco]:soybean oil); Research Diets D06061202 or CTL diet: 20% protein, 70% carbohydrate, and 10% fat (lard); Research Diets D12450B Offspring: Sta…	Dams: experimental diets given 4 weeks prior to mating, during gestation & lactation Offspring: standard chow at weaning (PN 21)	Adulthood PN 84+	EPM	Compared to CTL diet rats, perinatal saturated-fat and trans-fat diets increased anxiety-like behavior in males but not females
		Bukhari et al., 2018	Sprague-Dawley rats Dams Male & female offspring	Dams: High-fructose diet: 20.2% of calories from protein, 66.8% from carbohydrate (99:1% fructose:corn starch), and 13% from fat (lard); Envigo Teklad 89247 or CTL diet: 25% protein, 58% carbohydrate, and 17% fat; Envigo Teklad 7012 Offspring: CTL diet: 25% protein, 58% carbohydrate, and 17% fat; Envigo Teklad 7012	Dams: experimental diets given 1 week prior to mating, during gestation and until PN12. Offspring: CTL diet at PN 12	Adolescence PN 25-40 or adulthood	EPM	High-fructose diet offspring had anxiety-like behavior during adolescence, but anxiolytic-like behavior in the EPM at adulthood for both sexes
		Glendining et al., 2018	C57Bl6 mice Dams Male & female offspring	Dams: HFD: 20% of calories from protein, 35% from carbohydrate (50.6% sucrose), and 45% from fat (88:12% lard:soybean oil); Research Diets D12451; New Brunswick, NJ or CTL diet: 20% protein, 70% carbohydrate, and10% fat (55:45% soybean oil:lard); Research Diets D12450B Offspring: Standard chow (details not specified)	Dams: experimental diets started at 4 weeks of age, 8 weeks prior to mating, during gestation & lactation Offspring: standard chow at weaning (PN 21)	Adulthood PN 112	EPM	HFD offspring displayed anxiety-like behavior in the EPM (diet effect; post hoc significant for females only)
		Guedine et al. 2018	Rat (not specified) Dams Male offspring	Dams: CAF diet: CTL diet and a rotation schedule of 4 foods from a list of 28 human foods from the local market or CTL diet: Nuvilab® (Nuvital, São Paulo, Brazil) Offspring: CAF diet: CTL diet and a rotation schedule of 4 foods from a list of 28 human foods from the local market or CTL diet: Nuvilab® (Nuvital, São Paulo, Brazil)	CTL: dams and offspring on CTL diet Lactation CAF diet group: dams on CAF diet during lactation (PN 0-21), followed by CTL diet in offspring Post-lactation CAF diet group: dams on CTL diet during lactation, followed by CAF diet in offspring Total CAF diet group: dams and offspring on CAF diet	Adulthood PN 70+	OF EPM	Anxiety-like behavior in the EPM task in the post-lactation CAF diet and total CAF diet groups
		Kang et al., 2014	C57Bl6J mice (Jackson Laboratory, Bar Harbor, ME, USA) Dams Male & female offspring	Dams: HFD: 20% of calories from protein, 20% from carbohydrate, and 60% from fat (91:9% lard:soybean oil); Research Diets D12492; New Brunswick, NJ or CTL diet: 20% protein, 70% carbohydrate, and 10% fat (55:45% soybean oil:lard); Research Diets D12450B] Offspring: Standard chow (Harlan Laboratories, Madison, WI, USA)	Dams: experimental diets started at 6 weeks of age, 6 weeks prior to mating and during gestation, but were switched to opposite diet for lactation (CTL/CTL; CTL/HFD; HFD/CTL and HFD/HFD) Offspring: standard chow at weaning (PN 21)	Adolescence PN 32-35 OF PN 35-42 3-chamber social interaction test	OF and 3-chamber social interaction test	Anxiety-like behavior in HFD/HFD females only (OF and 3-chamber social interaction test)
		Peleg-Raibstein and Wolfrum, 2012	C57BL/6N mice (Charles River, Germany) Dams (10-11 weeks old) Male & female offspring	Dams: HFD: 60% kcal fat (Provimi Kliba, Kaiseraugst, Switzerland) or CTL diet: Kliba 3430, Klibamühlen, Kaiseraugst, Switzerland Offspring: CTL diet: Kliba 3430, Klibamühlen, Kaiseraugst, Switzerland	Dams: 9 weeks (includes the time prior to mating, gestation & lactation) Offspring: CTL diet at weaning (PN 21)	Adulthood PN 90+	OF EPM Food neophobia	HFD rats displayed anxiety-like behavior in the EPM task and food neophobia tasks
		Rincel et al. 2016	Wistar Rats (Janvier, Le Genest, Saint-Isle, France) Dams (11 weeks old) Male offspring	Dams: HFD: 15% kcal from protein, 39% kcal from fat (99:1% palm oil: rapeseed oil) and 46% kcal from carbohydrate (12.5% sucrose) or CTL diet: 18% kcal from protein, 12% kcal from fat (38:27:35% palm:rapeseed:high-oleic sunflower oil) and 70% kcal from carbohydrates (9.86% sucrose) Offspring: Laboratory chow (not specified)	Dams: HFD from Gestational day 0 to postpartum day 21 Offspring: Laboratory chow at weaning Maternal separation (PN 2-14 for 3 hours)	Adulthood PN 112	OF	HFD exposure resulted in anxiolytic-like behavior in offspring (more visits and distance spent in the center of OF)
		Sasaki et al., 2013	Long Evans rats Charles River Canada (St. Constant, QC) Dams (7 weeks old) Male & female offspring	Dams: HFD: 20% of calories from protein, 20% from carbohydrate, and 60% from fat (91:9% lard:soybean oil); Research Diets D12492; New Brunswick, NJ or CTL diet: 28.5% protein, 58% carbohydrate and 13.5% fat; Purina LabDiet 5001 Offspring: CTL diet: 28.5% protein, 58% carbohydrate and 13.5% fat; Purina LabDiet 5001	Dams: 4 weeks prior to mating, during gestation and lactation Offspring: CTL diet at weaning (PN 21)	Adulthood PN 90+	OF EPM Light-dark transition	Offspring of HFD group had increased anxiety-like behavior in the OF (males only)/EPM tasks (females only), but not in the light-dark transition task.
		Sasaki et al., 2014	Long Evans rats Charles River Canada (St. Constant, QC) Dams (7 weeks old) Male & female offspring	Dams: HFD: 20% of calories from protein, 20% from carbohydrate, and 60% from fat (91:9% lard:soybean oil); Research Diets D12492; New Brunswick, NJ or CTL diet: 28.5% protein, 58% carbohydrate and 13.5% fat; Purina LabDiet 5001 Offspring: CTL diet: 28.5% protein, 58% carbohydrate and 13.5% fat; Purina LabDiet 5001	Dams: experimental diets given 4 weeks prior to mating, during gestation & lactation Offspring: CTL diet at weaning (PN 21)	Adolescence PN 35-45	Light/dark box, OF and EPM	Male offspring of HFD group had increased anxiety like behavior in Light/dark box but both sexes exposed to HFD had reduced anxiety-like behavior in EPM and OF
		Speight et al., 2017	Wistar rats (Harlan, UK) Dams Male & female offspring	Dams: CTL diet + CAF diet [average of 38.3% saturated fat; pork pie, pate, cocktail sausages, cheese, crisps, jam, fruit and nut chocolate, golden syrup cake, shortbread and peanuts] or CTL diet: 24% protein, 58% carbohydrate, and 18% fat (average of 14.5% saturated fat); Harlan Teklad Global 18% Offspring: CTL diet: 24% protein, 58% carbohydrate, and 18% fat (average of 14.5% saturated fat); Har…	All animals fed the CTL diet throughout pre-gestional, gestational and lactation period, as well as after weaning. Half of dams also on CAF diet during the lactation period Offspring: CTL diet at weaning (PN 21)	Adolescence PN 23	EPM and OF	CAF diet exposure during lactation resulted in anxiolytic-behavior in the OF test
		Vuong et al., 2017	Sprague-Dawley rats Dams Male offspring	Dams: High-Fat/Sucrose Diet (to induce gestational diabetes mellitus): 20% of calories from protein, 35% from carbohydrate (50.6% sucrose), and 45% from fat (88:12% lard:soybean oil); Research Diets D12451; New Brunswick, NJ or CTL diet: 20% protein, 70% carbohydrate, and 10% fat (55:45% soybean oil:lard); Research Diets D12450B Offspring: Standard chow (Harlan Laboratories, Madison, WI, USA)	Dams: experimental diets given 6 weeks prior to mating, during gestation & lactation Offspring: experimental diets starting PN21 (either same or different from maternal diet)	Adulthood PN 98	OF	No effect of perinatal diet alone on anxiety-like behavior, but offspring that continued on a high-fat/sucrose diet displayed anxiolytic-behavior (increased center time)
		Winther et al., 2018	Sprague-Dawley rats (Taconic Bioscience, Ry, Denmark) Dams Male & female offspring	Dams: HFD: 20% of calories from protein, 20% from carbohydrate, and 60% from fat (91:9% lard:soybean oil); Research Diets D12492; New Brunswick, NJ] or CTL diet: 20% protein, 70% carbohydrate, and10% fat (55:45% soybean oil:lard); Research Diets D12450J Offspring: CTL diet: 20% protein, 70% carbohydrate, and10% fat (55:45% soybean oil:lard); Research Diets D12450J	Dams: experimental diets started at 7 weeks of age, 8 weeks prior to mating, during gestation & lactation Offspring: CTL diet at weaning (PN 21)	Adulthood PN 56 EPM and PN 77 OF	EPM and OF	HFD offspring displayed anxiety-like behavior in EPM, but no effect in OF (both sexes)
		Wright et al., 2011	Wistar rats (Harlan, UK) Dams Male & female offspring	Dams: CAF diet [biscuits, potato crisps, fruit and chocolate, Mars bars, cheddar cheese, golden syrup cake, pork pie, cocktail sausages, liver and bacon pâté, strawberry jam and peanuts] + CTL diet or CTL diet [B&K Universal, Hull, UK] Offspring: CTL diet [B&K Universal, Hull, UK]	Dams: fed CAF diet or CTL diet either before gestation (3 weeks of age, 8 weeks prior to mating), during gestation and/or during lactation Offspring: CTL diet at weaning (PN 21)	Adulthood PN 70	EPM and OF	CAF diet during lactation resulted in anxiolytic-like behavior in males in both the EPM and OF tests
		Zieba et al., 2019	C57Bl6J mice Dams Male offspring	Dams: HFD: 21% of calories from protein, 36% from carbohydrate (68.6% sucrose), and 43% from fat (88:12% lard:soybean oil); Speciality Feeds SF04-001; Glen Forrest, Australia or CTL diet: 22% protein,65% carbohydrate, and 13% fat; Gordon's Stock Feeds; Yanderra, Australia Offspring: Standard chow	Dams: experimental diets started at 3 weeks of age, 5 weeks prior to mating, during gestation & lactation Offspring: standard chow at weaning (PN 24)	Adulthood PN 266+	EPM, OF, Novelty Suppressed Feeding and Social Interaction Test	No group differences
	Learning & Memory	Bengoetxea et al., 2017	Wistar rats (Charles River) Dams Male & female offspring	Dams: HFD group: CTL diet + HFD (20% of calories from protein, 35% from carbohydrate (50.6% sucrose), and 45% from fat (88:12% lard:soybean oil); Research Diets D12451; New Brunswick, NJ) or CTL diet: CTL chow diet (details not specified) Offspring: CTL chow diet (details not specified)	Dams: experimental diets started at gestional day 14 and maintained throughout lactation Offspring: CTL chow at weaning (PN 21) *Prenatal stress in half of dams between gestational days 14-21	Adolescence (PN 28) or adulthood (PN 560; senescence)	NOR MWM	HFD offspring displayed impaired object recognition in old but not young males and poorer retention in MWM for both sexes at senescence (no difference in acquisition)
		Bilbo and Tsang, 2010	Sprague-Dawley rat Harlan (Indianapolis, IN, USA) Dams (60 days old) Male & female offspring	Dams: High‐saturated‐fat diet: 20% of calories from protein, 20% from carbohydrate, and 60% from fat (95:5% lard:soybean oil); Research Diets D12492; New Brunswick, NJ or High‐trans‐fat diet : 20% protein, 20% carbohydrate, and 60% fat (95:5% Primex [Crisco]:soybean oil); Research Diets D06061202 or CTL diet: 20% protein, 70% carbohydrate, and 10% fat (lard); Research Diets D12450B Offspring: Sta…	Dams: experimental diets given 4 weeks prior to mating, during gestation & lactation Offspring: standard chow at weaning (PN 21)	Adulthood PN 84+	MWM	Improved memory retention in male HFD (both saturated and trans-fat diets) offspring but not females
		Cordner et al., 2019	Sprague-Dawley rats (Charles River, Kingston, New York) Dams (arrived Gestational day 2) Male offspring	Dams HFD: Research Diets D12492, 60% kcal from fat, 20% kcal from protein, 20% kcal from carbohydrates or CTL diet: LabDiet 5001, 13.5% kcal from fat, 28.5% kcal from protein, 58% kcal from carbohydrates Offspring CTL diet: LabDiet 5001, 13.5% kcal from fat, 28.5% kcal from protein, 58% kcal from carbohydrates	Dams: experimental diets given from gestational day 2 til end of experiment Offspring: CTL diet at weaning (PN 21)	Adulthood PN 95+	NOR Barnes Maze	HFD offspring had impaired cognitive performance in both NOR and Barnes Maze
		Janthakhin et al. 2017	Wistar rat Dams (11 weeks old) Male offspring	Dams: HFD: D12451 from Research Diets, New Brunswick, NJ; 4.7 kcal/g, 45% of energy from lard fat, 20% from proteins and 35% from carbohydrates, with half from sucrose or CTL diet: D12450 K from Research Diets, New Brunswick, NJ; 3.85 kcal/g, 10% of energy from fat, 20% from proteins and 70% from carbohydrates with 0% sucrose Offspring: Standard laboratory chow (details not specified)	Dams: diets given from 1st day of gestation to postpartum day 21 Offspring: standard chow at weaning (PN 21)	Adulthood PN 84-140	COA	HFD offspring had impaired odor aversion memory
		Kuang et al., 2014	Sprague Dawley rats (Soochow University Experimental Animal Center) Dams Male offspring	Dams: Sucrose group: 20% weight/volume sucrose solution + standard chow (Slaccas, Shanghai, China) or CTL diet: water and chow (39.1% carbohydrates, 19.3% protein, 4.0% fat, 0.6% NaCl, 1.00% calcium, 0.70% phosphate and 0.68% potassium) Slaccas, Shanghai, China Offspring: Diet not specified	Dams: Gestation day 1-21 Offspring: weaned at PN 21	Adolescence or adulthood PN 28 or PN 56	MWM	No group differences
		Lépinay et al., 2015	Wistar rat (Charles River, France) Dams Male offspring	Dams: HFD: 39% energy from vegetable oils, 46% energy from carbohydrates, 18% energy from protein (Experimental Foods Preparation Unit (Institut National de la Recherche Agronomique, Jouy-en-Josas, France)) or CTL diet: 12% energy from fat, 70% energy from carbohydrates, 18% energy from protein (Experimental Foods Preparation Unit (Institut National de la Recherche Agronomique, Jouy-en-Josas, Fra…	Dams: experimental diets from gestation day 1-21 Offspring: CTL diet or HFD at PN 21-140	Adulthood (not specified)	MWM	HFD offspring weaned onto HFD, but not HFD offspring weaned onto chow, displayed impaired spatial memory during the test
		Moreton et al., 2019	Wistar rat dams (9 weeks old) Male and female offspring	Dams: CAF diet: CTL diet + highly palatable, energy-dense human foods or CTL diet: filtered tap water + Teklad Global 18% Protein Rodent Diet Harlan, UK Offspring: CTL diet: filtered tap water + Teklad Global 18% Protein Rodent Diet Harlan, UK	Dams: experimental diets fed during lactation after giving birth Offspring: standard diet at PN 21+	Adolescence PN 24-26	NOR	CAF offspring had impaired short-term object memory
		Page et al., 2014	Sprague Dawley rats Dams Male offspring	Dams: HFD: 45 kcal% fat D12451, Research Diets or CTL diet: 10 kcal% fat D12450B; Research Diets, New Brunswick, NJ Offspring: CTL diet or HFD (Research Diets, New Brunswick, NJ)	Dams were on the HFD starting 1 month before mating and during gestation and lactation. Offspring: CTL diet or HFD at PN 21+	Adulthood 110-118 days old	MWM	Offspring from HFD dams showed increased latency to reach platform during acquisition trials and had impaired spatial memory during test, regardless of offspring diet
		Peleg-Raibstein and Wolfrum, 2012	C57BL/6N mice (Charles River, Germany) Dams (10-11 weeks old) Male & female offspring	Dams: HFD: 60% kcal fat (Provimi Kliba, Kaiseraugst, Switzerland) or CTL diet: Kliba 3430, Klibamühlen, Kaiseraugst, Switzerland Offspring: CTL diet: Kliba 3430, Klibamühlen, Kaiseraugst, Switzerland	Dams: 9 weeks (includes the time prior to mating, gestation & lactation) Offspring: CTL diet at weaning (PN 21)	Adulthood PN 90+	Pavlovian Fear Conditioning	No effect
		Rincel et al. 2018	Wistar rat Dams (11 weeks old) Male offspring	Dams: HFD: 4.7 kJ/g, energy 45% fat (lard), 20% protein, and 35% carbohydrates (sucrose 17.5%; D12451, Research Diets, New Brunswick, NJ or CTL diet: 3.85 kcal/g, energy 10% fat, 20% protein, and 70% carbohydrates (sucrose 0%); D12450K, Research Diets, New Brunswick, NJ Offspring: Laboratory chow (details not specified)	Dams: 1st day of gestation to postpartum day 21 Offspring: laboratory chow at weaning (PN 21) Maternal separation (PN 2-14 for 3 hours)	Adulthood PN 168	Extinction of conditioned odor preference	HFD impaired extinction of conditioned odor preference, however this was not seen in HFD rats also exposed to maternal separation.
		Teixeira et al., 2020	Wistar rats (LabNutrex/ UFVJM) Dams (80+ days old) Male offspring	Dams: CAF diet: 4.74 kcal/g – protein 0,65 kcal/g; carbohydrates 1,88 kcal/g; fats 2,21 kcal/g or CTL diet: Nuvilab® CR-1 3.43 kcal/g – protein 0,83 kcal/g; carbohydrates 1,95 kcal/g; fats 0,65 kcal/g Offspring: CAF or CTL diet (same as their respective mothers)	Dams: CAF diet or CTL diet fed during lactation only Offspring: CAF or CTL diet continued at PN 21+	Adulthood PN 114-118	NOR	CAF offspring had impaired NOR memory
		Tozuka et al. 2010	C57BL/6J mice from Clea Japan (Tokyo, Japan) Dams (5 weeks old) Male offspring	Dams: HFD: 57% kcals fat; HFD-32 (Clea Japan) or CTL diet: standard chow (CE-2) (Clea Japan) Offspring: CTL diet	Dams: 6 weeks prior to mating to lactation day 16 Offspring: CTL diet at weaning	Adolescence (PN 28) or Adulthood (PN 77)	Barnes Maze	Adolescent offspring of HFD mice had impaired spatial learning, but no differences in memory probe trials. Adult offspring of HFD mice displayed no impairments.
		Vuong et al., 2017	Sprague-Dawley rats Dams Male offspring	Dams: HFD (to induce gestational diabetes mellitus): 20% of calories from protein, 35% from carbohydrate (50.6% sucrose), and 45% from fat (88:12% lard:soybean oil); Research Diets D12451; New Brunswick, NJ or CTL diet: 20% protein, 70% carbohydrate, and 10% fat (55:45% soybean oil:lard); Research Diets D12450B Offspring: Standard chow (Harlan Laboratories, Madison, WI, USA)	Dams: experimental diets given 6 weeks prior to mating, during gestation & lactation Offspring: experimental diets starting PN21 (either same or different from maternal diet)	Adulthood PN 98	NOR	HFD (perinatal HFD; HFD-CTL diet and HFD-HFD) impaired novel object recognition while offspring from CTL diet dams were able to discriminate, regardless of diet assigned at weaning (CTL-CTL and CTL-HFD)
		White et al., 2009	Long Evans rats (Harlan Laboratories, Indianapolis, IN) Dams (8 weeks old) Male offspring	Dams: HFD: (Research Diets D12492) 60% fat energy, 20% carbohydrate energy and 20% protein energy; energy density of 5.24 kcals/gm or CTL diet: (Research Diets D12450B) 10% fat energy, 70% carbohydrate energy and 20% protein energy; energy density of 3.85 kcals/gm Offspring: Standard chow (LabDiet 5001) at weaning; Standard chow (LabDiet 5001) or HFD (Research Diets D12492) at 8 weeks old	Dams fed HFD 4 weeks prior to mating, during gestation & lactation. Offspring: CTL diet from PN 21-56, then assigned either HFD or CTL diet	Adulthood PN 140	MWM	Perinatal HFD offspring given HFD at PN 56 had impaired memory retention
		Winther et al., 2018	Sprague-Dawley rats (Taconic Bioscience, Ry, Denmark) Dams Male & female offspring	Dams: HFD: 20% of calories from protein, 20% from carbohydrate, and 60% from fat (91:9% lard:soybean oil); Research Diets D12492; New Brunswick, NJ] or CTL diet: 20% protein, 70% carbohydrate, and10% fat (55:45% soybean oil:lard); Research Diets D12450J Offspring: CTL diet: 20% protein, 70% carbohydrate, and10% fat (55:45% soybean oil:lard); Research Diets D12450J	Dams: experimental diets started at 7 weeks of age, 8 weeks prior to mating, during gestation & lactation Offspring: CTL diet at weaning (PN 21)	Adulthood PN 63/70	NOR Y-maze	No diet effects
		Zieba et al., 2019	C57Bl6J mice Dams Male offspring	Dams: HFD: 21% of calories from protein, 36% from carbohydrate (68.6% sucrose), and 43% from fat (88:12% lard:soybean oil); Speciality Feeds SF04-001; Glen Forrest, Australia or CTL diet: 22% protein,65% carbohydrate, and 13% fat; Gordon's Stock Feeds; Yanderra, Australia Offspring: Standard chow	Dams: experimental diets started at 3 weeks of age, 5 weeks prior to mating, during gestation & lactation Offspring: standard chow at weaning (PN 24)	Adulthood PN 266+	Y-maze Contextual Fear Conditioning Cued Fear Conditioning	No diet effects
	Reward-motivated behavior	Gawlinski et al., 2020	Wistar rat dams Female offspring (Charles River, Germany)	Dams: HFD: 15% kcal from protein, 60% kcal from fat and 25% kcal from carbohydrate; C1057 mod., Altromin, Germany or High-sugar diet: 18% kcal protein, 12% kcal fat and 70% kcal from carbohydrate (44% from sucrose); C1010, Altromin, Germany or Mixed diet: 16% kcal from protein, 28% from kcal fat and 56% kcal from carbohydrate (18% kcal from sucrose); C1011, Altromin, Germany or CTL diet: 22% kcal…	Dams: diets initiated at conception and maintained until end of lactation Offspring: CTL diet at weaning (PN 22)	Adulthood PN 63	Cocaine self-administration (stable dose (0.5mg/kg) in PR and increasing doses (0.25-0.5-0.1mg/kg) in FR1, extinction and reinstatement)	No effect of diet on cocaine self-administration (either PR or increasing doses) or extinction. However, high-sugar diet significantly increased lever pressing upon both cue and cocaine-induced reinstatement
		Grissom et al., 2015	(C57BL/6 J × DBA/2 J) F1 male and female mice (in-house breeding colony)	Dams: HFD: Test Diet 58G9, 5.21 kcal/g with 18% of total energy calories from protein, 60% from fat, and 22% from carbohydrate or Low Protein Diet: Test Diet 5769, 4.13 kcal/g with 8.5% of total energy calories from protein, 22% from fat, and 69.5% from carbohydrate or CTL diet: Test Diet 5755, 4.09 kcal/g with 18% of total energy calories from protein, 22% from fat, and 60% from carbohydrate Off…	Dams: Gestation and lactation Offspring: standard chow at weaning (PN 21)	Adulthood PN 84-112	A) Pavlovian Conditioned Approach B) Fixed Ratio and PR Responding for food delivery C) 5-Choice Serial Reaction Time Test	Low-protein diet offspring displayed increased attention to reward-predicting cues in Pavlovian Conditioned Approach whereas HFD offspring had decreased motivation to earn a reward in PR. A low-protein maternal diet drove offspring inattention as measured by the number of increased omissions or inattentive errors, but a maternal HFD drove impulsivity in the 5-choice serial reaction time task as m…
		Morganstern et al., 2013	Sprague-Dawley rat dams (Charles River) Male offspring	Dams: HFD: 50% kcal fat (75:25% lard:vegetable oil), 25% kcal carbohydrates (40:30:30% sucrose:dextrin:cornstarch) and 25% kcal protein (casein) or CTL diet: 12% fat, 3.3 kcal/g Offspring: CTL diet: 12% fat, 3.3 kcal/g	Dams: diet initiated at gestational day 5 and maintained through gestation and lactation Offspring: CTL diet at weaning (PN22) *Animals were food restricted to 20g chow/day during operant training for 45mg sucrose pelletss (PN42-50)	Adulthood PN 60+	Nicotine self-administration (training done with sucrose pellets as reinforcer). Jugular catheterization at PN 50-55. Operant responding for 0.015mg/kg nicotine infusions in FR1-2-3-5 and PR.	Perinatal HFD increases breakpoint ratio for nicotine. Similar extinction of lever pressing and weaker reinstatement in perinatal HFD group.
		Naef et al. 2008	Male Sprague- Dawley rats (Charles River, St-Constant, Quebec, Canada)	Dams: HFD: 15% protein, 30% kcal fat and 24% carbohydrates; Teklad, IN, USA or CTL diet: 15% protein, 5% fat and 60% carbohydrates (likely w/w); Harlan Teklad, IN, USA Offspring: CTL diet: 15% protein, 5% fat and 60% carbohydrates (likely w/w); Harlan Teklad, IN, USA	Dams: diets maintained from gestation (GD 14) - PN 22 Offspring: CTL diet at weaning (PN 22)	Adulthood PN 79	Sensitization to amphetamine	HFD group was less sensitized
		Naef et al., 2011	Male Sprague- Dawley rats (Charles River, St-Constant, Quebec, Canada)	Dams: HFD: 15% protein, 30% kcal fat and 24% carbohydrates; Teklad, IN, USA or CTL diet: 15% protein, 5% fat and 60% carbohydrates (likely w/w); Harlan Teklad, IN, USA Offspring: CTL diet: 15% protein, 5% fat and 60% carbohydrates (likely w/w); Harlan Teklad, IN, USA	Dams: diets initiated at gestation day 12-13 and maintained until end of lactation (PN22) Offspring: CTL diet at weaning (PN 22)	Adulthood PN 90+	In vivo microdyalisis (NAc and PFC DA Locomotor response to D2/3 agonist Operant responding for fat/sugar rewards	HFD group enhanced locomotion following D2/3R agonism and increased operant responding for 35% fat, but not sucrose pellets.
		Ong and Muhlhausler 2011	Wistar rat dams Male and female offspring	Dams: Junk food diet: chow/lard mix, peanut butter, hazelnut spread, chocolate-flavored biscuits, extruded savory snacks, sweetened multigrain breakfast cereal and ham- and chicken-flavored processed meat or CTL diet: standard laboratory chow; Specialty Feeds, Glen Forrest, WW, Australia Offspring: Access to both junk food diet and CTL diet in homecage	Dams: diet initiated 4 weeks prior conception and maintained throughout gestation and lactation Offspring: access to both diets at weaning (PN 21) in homecage	Adolescence to adulthood PN 21-90	Food preference Lard/chow mix vs. Peanut butter vs. Hazelnut spread vs. Chocolate-flavored biscuits vs. Savory snacks vs. Sweetened breakfast cereal vs. Processed meat	Male and female junk food offspring showed increased fat and protein intake during adolescence and increased fat intake at adulthood. Adolescent male and female junk food offspring consumed more peanut butter and females also consumed more hazelnut spread. At adulthood, male junk food offpsring consumed more peanut butter and chocolate biscuits, while female junk food offspring had increased cons…
		Ong and Muhlhausler 2014	Wistar rat dams Male & female offspring	Dams: CAF diet (various human foods) or CTL diet: 5% fat (w/w); Specialty Feeds, Glen Forrest, WA, Australia) Offspring: CTL diet followed by the addition of CAF diet, then removal of CAF diet (see diet duration)	Dams: 4 wks before pregnancy, gestation, and lactation Offspring had CTL diet from PN 21-42 then CAF diet was added to their home cage from PN 42-63. Thereafter, rats switched back to the standard diet.	Adulthood PN 42-63	Junk food exposure for 3 weeks	Both male and female CAF offspring increased calories consumed, especially for carbohydrates during the junk food exposure
		Paradis et al., 2017	Sprague-Dawley rat dams (Janvier) Male offspring	Dams: Western diet: 21% kcal from beef fat and 29.45% kcal from sucrose; Abdiet Woerden, The Netherlands or CTL diet: 5.06% kcal from beef fat and 0% kcal from sucrose; Abdiet Woerden, The Netherlands Offspring: Standard chow: 3.1% kcal from fat and 2% kcal from sucrose	Dams: gestation day 1 until end of lactation Offspring: standard chow at weaning (PN21)	Adolescence/Adulthood PN 25, 45 or 95 (3 separate cohorts)	1-day (PN25) and 3-days (PN45 and PN95) 2-bottle choice fat preference test (1% corn oil solution in 0.3% xanthan gum vs. 0.3% xanthan gum)	WD but not CD offspring show a fat preference at PN25. Both groups show preference at PN45 and PN95. At PN45, WD offspring gradually decrease fat preference over days of testing. No difference at PN95.
		Peleg-Rabstein et al., 2016	C57Bl6N mice dams Male and female offspring (Charles River, Sulzfeld, Germany)	Dams: CTL diet: Kliba 3430, Klibamülhen, Kaiseraust, Switzerland or HFD: 60% kcal fat; Provimi Kliba, Kaiseraust, Switzerland Offspring: CTL diet: Kliba 3430, Klibamülhen, Kaiseraust, Switzerland	Dams: diet initiated 3 weeks prior to conception and maintained until end of lactation Offspring: CTL diet at weaning	Juvenile (PN35-45) Adulthood (PN70+) ***unclear which test occured when	Fat, sugar, saccharin and ethanol preference test (vs chow or water) Cocaine CPP and cocaine and amphetamine sensitization	HFD offspring had enhanced preference for fat, sugar and ethanol. Maternal HFD enhanced cocaine CPP as well as cocaine and amphetamine sensitization.
		Romaní-Pérez et al., 2016	Wistar rat dams Male offspring (Janvier, Le Genest, Saint Isle, France)	Dams: HFD (39–45% of energy from fat, prepared at Jouy en Josas, France: experiments 1–3; or Research Diets (D12451), Brogaarden, Denmark: experiment 3, batch for the microdialysis) or CTL diet: (12% of energy from fat) Offspring: CTL diet (Safe, Augy, France) or HFD (4.7 kcal/g; 45% of energy from fat, 41% of energy from carbohydrate with 17% from sucrose and 24% from proteins; D12451, Research …	Dams: CTL diet or HFD until pups weaned (PN 21) Offspring: maternal diet until PN 36, CTL diet or HFD from PN 36-90 (note: HFD group could choose between CTL diet or HFD for 5 weeks, then HFD was forced for 3 weeks) Maternal separation (daily separation for 3 hours): PN 2-14 in a subset of pups	Adulthood in PN 56 to PN 224 rats that received CTL diet post-weaning	Runway Task Operant Conditioning Test	Rather than maternal HFD, rats that underwent maternal separation were more motivated to obtain a palatable reward compared with CTLs. However, this higher motivation for palatable food in maternal separation rats was not associated with higher consumption of HFD in a free choice condition or in the operant conditioning during FR-1 when the effort to obtain the reward was low.
		Roversi et al., 2016	Wistar rat dams Male & female offspring	Dams: Hydrogenated vegetable fat group: water and food (Purina) + oral gavage of hydrogenated vegetable fat (HVF-rich in trans fatty acids) (3 g/kg; p.o.) or CTL diet: water and food (Purina) + oral gavage of water Offspring: Water and food (Purina)	Dams: gavaged 1 week before mating until weaning of the pups Offspring: water and food only after weaning	Adolescence PN 41+	CPP some rats receiving morphine injection (4 mg/kg body weight, i.p.) on one side and 0.9% saline injection on the other. Other rats received 0.9% saline injection on both sides.	Males from hydrogenated vegetable fat group showed preference for morphine paired context. Both CTL and hydrogenated vegetable fat females showed morphine preference, which was higher in hydrogenated vegetable fat females relative to CTL females.
		Sarker et al., 2019	C57BL/6N mouse dams Male and female offpsring (Charles River, Germany)	Dams: HFD: 5.25 kcal/g; 60% energy from fat, 23.9% crude protein, dry matter 92%, crude fat 35%, 23.2% NFE; Kliba- Nafag 2127, Kaiseraugst, Switzerland or CTL diet: 3.2 kcal/g, protein 21%, carbohydrates 39.8% and fat 5% (% of total kcals; 18.5% crude protein, dry matter 88%, crude fat 4.5%, 54.2% nitrogen free extract (NFE); Kliba-Nafag 3430, Klibamühlen Offspring: CTL diet: 3.2 kcal/g, protein …	Preconception: HFD for 3 weeks before mating, standard chow after Early gestation: HFD from G0-G11, standard chow after Late gestation: HFD from G12-G21, standard chow after Lactation: HFD from P0-P21 Offspring: CTL diet at weaning (PN 22)	Adulthood PN 70–110	a) HFD/Sucrose/alcohol preference test b) Amphetamine-induced locomotor activities	No differences in HFD or sucrose preference. Only HFD during late gestation resulted in increased alcohol preference. HFD starting as early as early gestation resulted in increased amphetamine sensitivity.
		Sarker et al., 2018	C57BL/6N mouse dams Male and female offspring (Charles River, Germany)	Dams: HFD: 5.25 kcal/g; 60% energy from fat, 23.9% crude protein, dry matter 92%, crude fat 35%, 23.2% NFE; Kliba- Nafag 2127, Kaiseraugst, Switzerland or CTL diet: 3.2 kcal/g, protein 21%, carbohydrates 39.8% and fat 5% (% of total kcals); 18.5% crude protein, dry matter 88%, crude fat 4.5%, 54.2% nitrogen free extract (NFE); Kliba-Nafag 3430, Klibamühlen Offspring: CTL diet: 3.2 kcal/g, protein…	Dams: 9 weeks (3 weeks preconception, 3 weeks gestation, and 3 weeks lactation) F1, F2, and F3 offspring: CTL diet (starting when F1 offspring is weaned at PN 22)	Adulthood	a) Fat (HFD), Sucrose (0.5, 1, and 3% concentration) or alcohol preference test (2, 5, and 8% concentration) b) amphetamine-induced locomotor activity c) CPP for cocaine (20 mg/kg) d) Behavioral sensitization to cocaine	a) No group differences in preference for fat or sucrose in either F2 or F3 offspring. b) F2 generation showed enhanced locomotor activity relative to CTLs In the F3 generation, only female offspring were more sensitized to amphetamine. c) Both F2 and F3 HFD offspring showed stronger preference for the cocaine-paired side in CPP relative to CTLs, especially females in the F3 generation. d) HFD F2…
		Song et al., 2020	Sprague-Dawley rat dams Female offspring (Experimental Animal Center of Xi’an Jiaotong University)	Dams: HFD: 20% kcal protein, 60% kcal fat and 20% kcal carbohydrate or CTL diet: 28.4% kcal protein, 13% kcal fat and 58.6% kcal carbohydrate Offspring: CTL diet: 28.4% kcal protein, 13% kcal fat and 58.6% kcal carbohydrate	Dams: diet initiated following copulatory plug formation and maintained throughout gestation and lactation (*half of HF-fed dams had access to a running wheel from mating until PN15) Offspring: CTL diet at weaning	Adulthood PN 84	Diet preference Novel chow diet: 13.5% kcal fat; LabDiet 5001 vs. Novel HF diet: 45% kcal fat; Research Diets D12451 for 9 days	Maternal HFD decreased fat preference only in offspring from dams who had access to a running wheel. No significant difference in the HFD-sedentary group.
		Wu et al. 2013	Wistar Dams Male Wistar rats (Shanghai Laboratory Animal Center)	Dams: HFD: 60% kcal from fat, 20% kcal protein, 20% kcal carbohydrate; 5.21 Kcal/g; D12492, Research Diets, USA or Palatable diet: ~60% kcal from sucrose; 73.1% kcal carbohydrate, 16.4% kcal protein and 10.5% kcal fat; 4.07 Kcal/g; D12329, Research Diets, USA or CTL diet: 64% carbohydrate, 20% protein and 7.0% fat (D10012G, Research Diets, USA) Offspring: CTL diet: 64% carbohydrate, 20% protein a…	Dams: HFD, Palatable diet, or CTL diet during pre-conception (6 weeks), gestation and lactation Offspring: CTL diet after weaning	Adulthood PN 70+	Attentional set-shifting and visual discrimination reversal learning for sucrose pellet reward	Impaired reversal learning in both tasks in both HFD and palatable diet offspring
	Social Behavior	Buffington et al., 2016	C57Bl6J mice Dams Male offspring	Dams: HFD: 20% kcal from protein, 60% kcal from fat and 20% kcal from carbohydrate; D12492, Research Diets or CTL diet: 30% kcal from protein, 13.4% kcal from fat and 57% kcal from carbohydrates; Lab Diets #5001 Offspring: standard chow at weaning	Diets initiated 8 weeks prior to mating and maintained throughout gestation and lactation Offspring: standard chow at weaning	Adolescence-Adulthood PN 49-84	Reciprocal social interaction and three-chamber social test	Maternal HFD decreased interaction time and contact duration in the reciprocal social interaction test. Similarly, maternal HFD reduced sociability and social novelty in the 3-chambers social test. Social deficits were rescued when HFD offspring were co-housed with regular diet offspring.
		Kang et al., 2014	C57Bl6J mice (Jackson Laboratory, Bar Harbor, ME, USA) Dams Male & female offspring	Dams: HFD: 20% of calories from protein, 20% from carbohydrate, and 60% from fat (91:9% lard:soybean oil); Research Diets D12492; New Brunswick, NJ or CTL diet: 20% protein, 70% carbohydrate, and 10% fat (55:45% soybean oil:lard); Research Diets D12450B] Offspring: Standard chow (Harlan Laboratories, Madison, WI, USA)	Dams: experimental diets started at 6 weeks of age, 6 weeks prior to mating and during gestation, but were switched to opposite diet for lactation (CTL/CTL; CTL/HFD; HFD/CTL and HFD/HFD) Offspring: standard chow at weaning (PN 21)	Adolescence PN 38-42	Three-chamber social interaction test	Maternal HFD decreased sociability in offspring
		Rincel et al., 2016	Wistar Rats (Janvier, Le Genest, Saint-Isle, France) Dams (11 weeks old) Male offspring	Dams: HFD: 15% kcal from protein, 39% kcal from fat (99:1% palm oil: rapeseed oil) and 46% kcal from carbohydrate (12.5% sucrose) or CTL diet: 18% kcal from protein, 12% kcal from fat (38:27:35% palm:rapeseed:high-oleic sunflower oil) and 70% kcal from carbohydrates (9.86% sucrose) Offspring: Laboratory chow (not specified)	Dams: HFD from Gestational day 0 to postpartum day 21 Offspring: Laboratory chow at weaning Maternal separation (PN 2-14 for 3 hours)	Adulthood PN 168	Social Interaction Test	Maternal HFD was protective against the negative impact of early life stress on social interactions.
		Teixeira et al., 2020	Wistar rats (LabNutrex/ UFVJM) Dams (80+ days old) Male offspring	Dams: CAF diet: 4.74 kcal/g – protein 0,65 kcal/g; carbohydrates 1,88 kcal/g; fats 2,21 kcal/g or CTL diet: Nuvilab® CR-1 3.43 kcal/g – protein 0,83 kcal/g; carbohydrates 1,95 kcal/g; fats 0,65 kcal/g Offspring: CAF or CTL diet	Dams: CAF diet or CTL diet fed during lactation only Offspring: CAF or CTL diet continued at PN 21+	Adulthood PN 114-118	Social Interaction Test	The number of total social interactions and total interaction time was lower in the CAF diet group relative to CTLs.
		Zieba et al., 2019	C57Bl6J mice Dams Male offspring	Dams: HFD: 21% of calories from protein, 36% from carbohydrate (68.6% sucrose), and 43% from fat (88:12% lard:soybean oil); Speciality Feeds SF04-001; Glen Forrest, Australia or CTL diet: 22% protein,65% carbohydrate, and 13% fat; Gordon's Stock Feeds; Yanderra, Australia Offspring: Standard chow	Dams: experimental diets started at 3 weeks of age, 5 weeks prior to mating, during gestation & lactation Offspring: standard chow at weaning (PN 24)	Adulthood PN 272	Social Interaction Test	No effect of diet
Adolescence	Anxiety-like behavior	Abildgaard et al., 2014	Male Wistar rats	HFD: 20% of calories from protein, 20% from carbohydrate, and 60% from fat (91:9% lard:soybean oil); Research Diets D12492; New Brunswick, NJ or CTL diet: 24% protein, 65% carbohydrate and 11% fat; Altromin 1324 *Half of rats were exposed to dexamethasone in utero (saline as CTL; daily s.c. injections gestational day 14-21)	PN 44-105	Adulthood PN 86	OF (PN 86)	No effect in OF
		da Costa Estrela et al., 2015	Female Wistar rats Biotério Central (Animal Facility) of the Federal University of Goiás (Goiás, Brazil)	CAF diet: human foods, water, sucrose solution (300g/L), and cola-type soft drink) + CTL diet or CTL diet (Nuvilab — CR1®)	Diets given from PN 45+ until end of entire experiment, half of the animals from each experimental group were stressed (by restraint) after 8 weeks on the diet (PN 101) for 50 days	Adulthood, PN 151-155	OF EPM Forced Swim Test	CAF diet only Increased anxiety-like behavior in the EPM and depressive-like behavior in the forced swim test of rats in rats that also received restraint stress
		Del Rio et al., 2016	C57Bl6J male mice (CRIFA, Barcelona, Spain)	HFD: 45% kcal from fat, 35% kcal from carbohydrates and 20% kcal protein (TestDiet, England, D12451) or CTL diet: 18% kcal from fat, 58% kcal from carbohydrates and 24% kcal from protein (Teklad Global 18% Protein Rodent Diet)	PN 35+	EPM/OF: Adulthood (PN 91-105) Forced swim: PN 37 or PN 91	EPM OF Forced Swim Test	No diet effect
		Ferreira et al., 2018	Male Wistar rats Institute for Molecular and Cell Biology (Porto, Portugal)	High sugar diet: 30% sucrose solution + CTL diet or CAF diet: 4.5 Kcal/g, approximately 12% of energy as protein, 45% as fat and 43% as carbohydrates, 15% sucrose solution (Sigma; 0.6 Kcal/ml) + CTL diet or CTL diet: 3.9 Kcal/g, 20% of energy as protein, 12% as fat and 68% as carbohydrates; Mucedola, Italy	PN 28-84	Adulthood PN 84+	OF EPM Forced Swim Test	CAF rats had increased anxiety-like behavior in the EPM, but no effects seen in OF or Forced Swim.
		Gancheva et al., 2017	Male Wistar rats (Vivarium of Varna Medical University)	HFD: chow with 20% w/w lard (45% kcal from lard) + 10% fructose drinking solution or High fat/high fructose: chow with 17% w/w lard a(38% kcal from lard) nd 17% w/w fructose (20% kcal fructose) + 10% fructose drinking solution or CTL diet: 29% kcal protein, 10% kcal fat and 61% kcal carbohydrate; TopMix	PN 42-98	Adulthood PN 98+	OF and Social Interaction Test	HFD and high-fat/high-fructose diet rats had increased anxiety-like behavior in OF. HFD rats also had decreased sociability in social interaction test
		Gueye et al., 2018	Male Wistar rats (Charles River)	Sugar diet: free access to a 5% sucrose solution + CTL diet or CTL diet: 16.5% protein, 3% fat and 59% carbohydrate	PN 30-46 (sucrose) ***Daily ip injections of imipramine or saline (PN 47-274) in another cohort	Adulthood PN 204	Novelty suppressed feeding	Anxiety-like behavior after adolescent exposure to sucrose solution (reversed by imipramine tx)
		Harrell et al., 2015	Male Wistar rats (Charles River)	Fructose diet: 55% fructose; Research Diets D05111802 or CTL diet: 0.3% fructose; LabDiet 5001	PN 25-94 or PN 64-134	Adulthood PN 76-94 or PN 116-134	OF and EPM	No diet effect
		Kalyan-Masih et al., 2016	Male Lewis rats Charles River Laboratories LEW/Crl rats; RRID: RGD_737932	Western HFD (41.4% kcal fat; 4.7 kcal/g, catalog #F6724, Bio-Serv) or CTL diet: 16.5% kcal fat; 3.8 kcal/g, catalog #F06405, Bio-Serv based on standard AIN-93G formulations	PN 28-102	Adulthood PN 95+	Acoustic startle reflex OF EPM	Following stress, Western Diet consumption impaired startle responses to acoustic simuli and increased anxiety-like behaviors in the OF and EPM tests
		Kim et al., 2018	Male and female Sprague-Dawley rats (Samtako Bio, Osan, Korea)	Highly palatable diet: CTL diet + chocolate cookie (Oreo cookie, Kraft Foods) or CTL diet: 23.9% protein, 10.7% fat and 45% carbohydrate	PN 22-66	Adolescence PN 54-66	EPM	Anxiety-like behavior in highly palatable diet in males (open arm time)
		Kruse et al., 2019	Male Sprague-Dawley rats	Sugar diet: 10% Sucrose (w/v made up on tap water), water and food (details not specified) or CTL diet: food (details not specified) and water	Adolescence (PN 25-50), then sucrose removed for 25 days or Adulthood (PN 75-100), then sucrose removed for 25 days	PN 75 (adolescent group) PN 125 (adult group)	OF Fear learning	Rats exposed to sucrose during adolescence displayed anxiety-like behavior in the OF and did not extinguish freezing behavior in a fear learning task. No effect was seen in the OF test in rats exposed to sucrose in adulthood.
		Lalanza et al., 2014	Male & female Sprague-Dawley rats (bred at Universitat de Barcelona)	CAF Diet (10% proteins; 41% fat; and 49% carbohydrates) or standard chow (24% protein, 18% fat and 58% carbohydrates; Harlan, Barcelona, Spain)	PN 21-70 followed by a 1 week withdrawal from CAF diet	Adulthood PN 70-77	EPM OF	CAF diet rats had anxiolytic-like behavior in EPM (more time spent in open arms), but anxiety-like behavior in OF after dietary withdrawal
		Maniam and Morris, 2010	Male & Female Sprague Dawley rats bred at the Animal Resource Centre (Perth, Australia)	CAF diet: 15.3 kJ/g, energy 32% fat, 18% protein, and 50% carbohydrate comprising four different types of food of known calories (cakes, biscuits, dim sim and meat pies) provided in addition to modified chow (60% powdered chow, 33% sweetened condensed milk, 7% saturated animal fat) or CTL diet: 11 kJ/g, energy 12% fat, 21% protein, 65% carbohydrate, Gordon's Specialty Stockfeeds, NSW, Australia	PN 20+ Maternal separation (15 or 180 minutes from PN 2-14)	Adulthood PN 77	EPM Light/dark test	Male, but not female, CAF rats that were non-handled displayed anxiolytic-like behavior In the EPM test compared to CTL non-handled rats. Male and female CAF, but not CTL, rats that received longer maternal separation (180 min) displayed anxiolytic-like behavior in the EPM. In the light/dark test, male, but not female, non-handled CAF rats displayed anxiolytic-like behavior. Male rats with 180 mi…
		Maniam et al., 2016	Male Sprague-Dawley rats	High fat/sucrose diet: CTL diet + (17% kcal protein, 43% kcal fat and 40% kcal sucrose chow; SF03-020 Specialty Feeds, Glen Forrest, Australia) or CTL diet: 21% protein, 65% carbohydrate, and 12% fat; Gordon's Stock Feeds; NSW, Australia	PN 21-77 *Limited nesting P2-9 in half of animals	Adulthood PN 70	EPM	High-fat/sucrose diet prevented anxiogenic effect of limited nesting
		Marcolin et al., 2012	Male Wistar rats	Palatable diet: condensed milk and sucrose-enriched (38% more caloric than the standard chow) or CTL diet: standard chow (details not specified)	Diet exposure: PN 21-28 Social isolation PN 21-28	PN 28	EPM OF	Palatable diet-rats displayed anxiolytic-like behavior in both the EPM and OF tests.
		Vega-Torres et al., 2018	Male Lewis rats Charles River Laboratories (Portage, MI, USA)	HFD: 41% kcal fat, Bio-Serv, Frenchtown, NJ, USA or CTL diet: 13% kcal fat, based on AIN-93G formulation from Bio-Serv Frenchtown, NJ, USA	PN 28-110	Adulthood PN 88+	Acoustic startle reflex (ASR) Fear-potentiated startle (FPS)	Western diet rats had reduced latencies for acoustic startle responses relative to CTLs.
		Vega-Torres et al., 2020	Male Lewis rats (Charles River, USA)	Western diet: 16% kcal protein, 41% kcal fat and 41% kcal carbohydrate; Bio-Serv F7462; Frenchtown, NJ, USA or CTL diet: 19% kcal protein, 13% kcal fat and 68% kcal carbohydrate; Bio-Serv F7463; Frenchtown, NJ, USA	PN 31-44 or PN 81-94	Adolescence (PN 42) or Adulthood (PN 92)	EPM	No diet effect
		Vinuesa et al., 2016	Male C57BL/6J Mice (Jackson Laboratories, Bar Harbor, ME)	HFD: 3.9 kcal/g energy; carbohydrate 22.5%, proteins 22.8%, fat 21.1%, fibers 23.0%, minerals 5.6% and humidity 5.0%. The main fat components of HFD pellets were monounsaturated fatty acids (44.7%), saturated fatty acids (29.8%) and polyunsaturated fatty acids (20.9%) Gepsa Feeds (Grupo Pilar, Pilar, Buenos Aires, Argentina or CTL diet: 2.5 kcal/g energy (carbohydrate 28.8%, proteins 25.5%, fat 3…	PN 28-140	Adulthood PN 84-112	EPM OF Tail suspension test	HFD-exposed mice displayed depressive-like behavior in the tail suspension test and had anxiety-like behavior in the EPM, but not OF test.
		Yang et al., 2020	C57Bl6J male mice (Chengdu DaShuo Experimental Animal Company (Chengdu, China))	HFD: 20% kcal from protein, 60% kcal from fat and 20% kcal from carbohydrate; DIO Series Diet, #H10060, Beijing HFK Bioscience Co., Ltd or CTL diet: DIO Series Diet, #1025, Beijing HFK Bioscience Co., Ltd	PN 21-70	Adulthood PN 63+	Marble burying, OF and EPM	HFD increased number of marbles buried, decreased center time in OF and reduced open arm time in EPM.
	Learning & Memory	Abbott et al., 2016	Male and female Sprague Dawley rats (Animal Resources Center, Western Australia)	Sugar diet: 10% sucrose (w/vol; CSR white sugar; 1.7kJ/mL) + CTL diet or CTL diet: chow (details not specified) and water	Intermittent sucrose access during adolescence: 2 hr/day from PN 28-56 with chow and water available all day	Adolescence PN 42-56	NOR, place, and object-in-place recognition tasks	Sucrose rats were impaired in place, but not object, recognition in both sexes. Only male sucrose rats were impaired in object-in-place recognition. During the place recognition task, female rats were specifically impaired during metestrus and performed better at the task during proestrus.
		Alten et al., 2018	Male Wistar Albino rats (Kobay, Turkey)	Sugar diet: 11% weight/volume carbohydrate containing high fructose corn syrup solution and chow (details not specified); no water access or CTL diet: chow (details not specified) and tap water	PN 21-63	Adolescence PN 36-42	MWM	High fructose corn syrup consumption impaired spatial learning
		Blanco-Gandía et al., 2019	Male mice (OF1 outbred strain from Charles River (France))	HFD: TD.06415, 45 kcal % fat, 36 kcal % carbohydrates and 19% kcal protein; 4,6 kcal/g; Harlan Laboratories Models, S. L. (Barcelona, Spain) or CTL diet: Teklad Global Diet 2014, 13 kcal % fat, 67 kcal % carbohydrates and 20% kcal protein; 2,9 kcal/g; Harlan Laboratories Models, S. L. (Barcelona, Spain)	From PN 29-69, HFD groups either had 1) continuous access or 2) binge access (2 hr/day, 3x a week, 2-3 hrs into the dark cycle) whereas CTL diet had continuous access. (adolescence and adulthood)	Adulthood PN 73+	Passive Avoidance Test Hebb Williams Maze	Avoidance behavior was similar in all groups. Continuous access to a HFD was the only group that displayed memory and spatial learning deficits, however withdrawal from the diet for 15 days normalized the memory deficit.
		Boitard et al., 2012	Male C57BL6/J mice (Janvier, Le Genest St., Isle, France)	HFD: 45% kcal fat from lard, 35% kcal carbohydrates with 17.5% kcal from sucrose, Research Diets D12451 or CTL diet: 8% kcal fat, 72% kcal carbohydrates, SAFE A04, Augy, France	Adolescent group: PN 21-98 Adult group: PN 84-161	Adulthood PN 98 (adolescent group) or PN 161 (adult group)	Relational Memory Flexibility using a Radial Maze	Adolescent, but not adult, HFD mice had impaired spatial and relational memory flexibility
		Boitard et al., 2014	Male Wistar Rats (Janvier, France)	HFD: 45% kcal fat from lard, 35% kcal carbohydrates with 17.5% kcal from sucrose, Research Diets D12451 or CTL diet: 8% kcal fat, 72% kcal carbohydrates, SAFE A04, Augy, France	Adolescent groups: PN 21-49 PN 21-77 Adult groups: PN 84-112 PN 84-140	Adulthood PN 49 or 77 (adolescent groups) PN 112 or 140 (adult groups)	MWM	Adolescent, but not adult, HFD rats had impaired spatial memory and were slower to learn a MWM reversal learning task, suggesting impaired spatial memory flexibility
		Boitard et al., 2015	Male Wistar Rats (Janvier, France)	HFD: 45% kcal fat from lard, 35% kcal carbohydrates with 17.5% kcal from sucrose, Research Diets D12451 or CTL diet: 8% kcal fat, 72% kcal carbohydrates, SAFE A04, Augy, France	Adolescent groups: PN 21-63 PN 21-105 Adult group: PN 84-196	Adulthood PN 63 or 133 (adolescent groups) PN 196 (adult group)	COA Auditory Fear Conditioning	Adolescent rats exposed to HFD for 3 months (PN 21-105), but not adolescent rats exposed to HFD for 1.5 months (PN 21-63) or adults exposed to HFD, had enhanced conditioned odor aversion memory. Adolescent, but not adult, rats on HFD for 3 months had enhanced auditory fear memory.
		Boitard et al., 2016	Male Wistar Rats (Janvier, France)	HFD: 45% kcal fat from lard, 35% kcal carbohydrates with 17.5% kcal from sucrose, Research Diets D12451 or CTL diet: 8% kcal fat, 72% kcal carbohydrates, SAFE A04, Augy, France	Experiment diet from PN 21-245 or HFD from PN 21-105 followed by chow until PN 245	Adulthood PN 168	MWM COA	HFD rats had impaired spatial memory, but CTL rats and HFD rats switched to chow did not. HFD rats also displayed more severe aversion to a conditioned odor than CTL rats, an effect that was partially alleviated by switching to a chow diet.
		Buyukata et al., 2018	Male and female Sprague Dawley rats (Animal Resources Centre, Western Australia)	Sugar diet: 10% sucrose (w/vol; CSR white sugar; 1.7kJ/mL) with CTL diet or CTL diet: Meat Free Rat and Mouse Diet, Specialty Feeds, Western Australia; energy composition of 14 kJ/g, 23% protein, 12% fat, 65% carbohydrates and water	Intermittent sucrose access during adolescence: 2 hr/day from PN 28-56 with CTL diet and water available all day.	Adolescence PN 42-46 NOR PN 52-56 SLR	NOR and Spontaneous Location Recognition	Both sexes that consumed sucrose were impaired in NOR when the novel object was similar to the familiar object. However, only male sucrose rats were impaired in the spontaneous location recognition task.
		Del Rio et al., 2016	C57Bl6J male mice (CRIFA, Barcelona, Spain)	HFD: 45% kcal from fat, 35% kcal from carbohydrates and 20% kcal protein (TestDiet, England, D12451) or CTL diet: 18% kcal from fat, 58% kcal from carbohydrates and 24% kcal from protein (Teklad Global 18% Protein Rodent Diet)	PN 35+	Adolescence & Adulthood 48 hours (PN 37), 1 week (PN 42), 4 weeks (PN 63), or 8 weeks (PN 91) after HFD	NOL	Spatial memory was impaired in mice after 4 weeks (PN 63) of HFD
		Ferreira et al., 2018	Male Wistar rats Institute for Molecular and Cell Biology (Porto, Portugal)	High sugar diet: 30% sucrose solution + CTL diet or CAF diet: 4.5 Kcal/g, approximately 12% of energy as protein, 45% as fat and 43% as carbohydrates, 15% sucrose solution (Sigma; 0.6 Kcal/ml) + CTL diet or CTL diet: 3.9 Kcal/g, 20% of energy as protein, 12% as fat and 68% as carbohydrates; Mucedola, Italy	PN 28-84	Adulthood PN 84+	NOR MWM Fear Conditioning	The CAF diet, but not sugar, group had impaired spatial reference memory in the MWM. No differences were found in working memory (MWM), in the NOR task, or in fear conditioning.
		Gomez-Smith et al., 2016	Male Sprague Dawley rats (Charles River Laboratories, Montreal, Canada)	CAF diet: highly palatable human foods along with CTL diet and a 12% sucrose solution or CTL diet: Teklad Global 18% Protein Rodent Diet; Harlan, Madison, WI and water	PN 21-105, sub-group of CAF rats switched to CTL diet for one month at PN 105	Adulthood PN 112	Barnes Maze	CAF rats were not impaired
		Hsu et al., 2015	Male Sprague Dawley rats (Envigo, Placentia, CA, USA)	Sucrose diet: CTL diet + 11% w/v sucrose solution or High fructose corn syrup diet: CTL diet + 11% w/v high fructose corn syrup or CTL diet: LabDiet 5001, St. Louis, MO and water	Adolescent group: PN 30-60 Adult group: PN 60-90	Adulthood PN 60+ (adolescent group) PN 90+ (adult group)	Barnes Maze Y-Maze	The high fructose corn syrup group exposed during adolescence showed impaired spatial memory. No group differences in the non-spatial Y-maze task.
		Hwang et al., 2010	Male and female C57BL/6J mice	HFD: 45% kcal fat (Research Diets, Inc., NJ) or CTL diet: 13.5% kcal fat	PN 21 to PN 252 or 357	Adulthood PN 252-357	Step-down Passive Avoidance Task/ Contextual Fear Conditioning Task	No differences in the step-down passive avoidance task. HFD males, but not females, exhibited less conditioned freezing behavior than CTLs.
		Kaczmarczyk et al., 2013	Male C57BL/6J mice	HFD: 60% kcal fat, Research Diets D12492 or CTL diet: 10% kcal fat, Research Diets D12450B	PN 21-28 or PN 21-42	Adolescence PN 28 or 42	NOR Y-maze	Object recognition memory was impaired at both timepoints in the HFD mice. Alternations in the Y-maze was impaired at PN 28 in HFD mice, but not at PN 42.
		Kendig et al., 2013	Male Hooded Wistar rats (Lab Animal Services at the University of Adelaide)	Sugar group: Specialty Feeds®, 3.4 kcal/g; 20% protein, 4% fat,60% carbohydrate and tap water in home cage; 10% w/v sucrose solution approx. 0.4 kcal/g (CSR® white sugar; Victoria, Australia) in experimental cage or CTL group: Specialty Feeds®, 3.4 kcal/g; 20% protein, 4% fat,60% carbohydrate and tap water in home cage; 0.1% sodium saccharin solution (Sigma, Missouri, USA) in experimental cage	Intermittent sucrose or sodium saccharin access for 2 hr/day from PN 28–55 (adolescent group) PN 63–91 (adult group)	Adulthood PN 61 (adolescent group) or PN 96 (adult group)	MWM	Sucrose-exposure, whether during adolescence or adulthood, impaired spatial memory.
		Khazen et al., 2019	Male Sprague Dawley rats (local animal colony; Haifa University)	HFD: 5.2 kcal/g [consisting of 35% fat, mostly saturated fat from lard (60% kcal), and 26% carbohydrate (20% kcal) (D12492, Research Diets, New Brunswick, NJ)] or CTL diet: 3 kcal/g [consisting of 4% fat and 60% carbohydrate (35% kcal) (ENVIGO, Israel)]	Adolescence group: PN 21-28 Adulthood group: PN 60 to PN 67 or 69	Adolescence or adulthood PN 29 or PN 68 or PN 70	NOL	Adolescent, but not adult, HFD rats had impaired object location memory
		Klein et al., 2016	Female C57Bl6 mice (breeding pairs from Jackson Laboratory, Bar Harbor, ME)	HFD: 20% of calories from protein, 20% from carbohydrate, and 60% from fat (91:9% lard:soybean oil); Research Diets D12492; New Brunswick, NJ or CTL diet: 20% protein, 70% carbohydrate, and 10% fat (55:45% soybean oil:lard); Research Diets *Half of mice also had continuous access to a running wheel	PN 42-126	Adulthood PN 126	MWM	No diet effect on learning, but HFD impaired cognitive flexibiliy at day 1 of reversal training (restored the second day). Flexibility deficit absent when HFD-fed mice had access to wheel running (despite greater body weight).
		Labouesse et al., 2016	Male C57BL/6 N mice or transgenic male mice overexpressing RELN under the control of calcium-calmodulin-dependent kinase IIα promoter	HFD: 63% calories from fat; KLIBA, Kaiseraugst, Switzerland or CTL diet: standard chow (KLIBA)	Adolescents: PN 28+ Adults: PN 70+	Adulthood PN 70-120 (adolescent group) or PN 110-150 (adult group)	Y-Maze Water T-Maze Cued Fear Conditioning	Adolescent, but not adult, HFD led to deficits in working memory (Y-maze), reversal learning (T-maze), and extinction learning (Cued Fear Conditioning)
		Marwitz et al., 2015	Male Sprague Dawley rats Harlan Laboratories (Virginia)	Western diet: powdered chow containing lard and dextrose, 41.7% kcal fat, 4.4 kcal/g, Teklad, #04489 or CTL diet: standard powdered chow (13.4% kcal fat, 3.02 kcal/g, Lab Diet #5001)	PN 37-121	Adulthood	NOR Attentional set-shifting task	Western diet-fed rats showed NOR impairments. Attentional set-shifting was not affected by Western Diet exposure.
		Noble et al., 2019	Male Sprague Dawley rats (Envigo, Placentia, CA, USA)	Sugar group: CTL diet + 11% weight-by-volume (w/v) high fructose corn syrup or CTL diet: Standard chow (LabDiet 5001, St. Louis, MO) and water	Intermittent access (2 hr/day) or ad libitum sugar access from PN 26-56. CTL animals received CTL diet ad libitum.	Adulthood PN 175-179	Novel object in context	Episodic memory was impaired in both the intermittent and ad lib high fructose corn syrup groups
		Reichelt et al., 2020	Male Sprague Dawley rats (Animal Resources Centre, Western Australia)	CTL diet + 2h/day access to High-fat/high-sugar diet: 9% kcal from protein, 36% kcal from fat (lard) and 55% kcal from sucrose; SP04-025, Gordon's Specialty Stockfeeds, Australia or CTL diet: 23% kcal from protein, 12%kcal from fat and 65% kcal from carbohydrate; Gordon's Specialty Stockfeeds, Australia	PN 28-56	Adolescence PN 42+	Odor memory and NOR	High-fat/high-sugar rats had impaired NOR but had no impact on odor memory
		Reichelt et al., 2015	Male Sprague Dawley rats (Animal Resources Centre, Western Australia)	Sugar group: 200 mL of 10% sucrose (w/vol; CSR white sugar; 1.7kJ/mL) with chow (details not specified) and water or CTL diet: ad lib chow (details not specified) and water	Intermittent sucrose access during adolescence: 2 hr/day from PN 28-56 with CTL diet available all day. At PN 58, all rats were food restricted	Adulthood PN 62-92	Biconditional Discrimination (BD) task Object-in-place task	Sucrose rats were impaired at utilizing contextual informaiton to respond to incongruent stimuli in the BD task and at object-in-place spatial memory.
		Reichelt et al., 2016	Male Sprague Dawley rats (Animal Resources Centre, Western Australia)	Sugar group: 10% sucrose (w/vol; CSR white sugar; 1.7kJ/mL) with chow (details not specified) and water or CTL diet: ad lib chow (details not specified) and water	Intermittent sucrose access during adolescence: 2 hr/day from PN 28-56 with CTL diet available all day.	Adolescence PN 52-56	Spontaneous location recognition (SLR) task	Sucrose rats were impaired in using spatial cues to identify the novel location of an object when the objects were previously spaced closer to each other, as opposed to equidistant.
		Torre et al., 2020	Male Wistar Rats	Palatable diet: 14.7% starch, 26.7% sucrose/lactose, 24.9% protein, 6.5% fat, 346.3 kcal/100g food) and standard chow or CTL diet: 49% carbohydrates mainly from starch, 22% protein, 4% fat, 301.2 kcal/100g food	PN 21+	Adulthood PN 64+	NOR Y-Maze Contextual Fear Conditioning	Palatable diet group had Impaired short-term and long-term memory in the novel object recognition test in adulthood and impaired short-term memory in the object place recognition test. Palatable diet also led to Impaired spatial (Y-maze) and aversive memory (Fear conditioning)
		Underwood and Thompson 2016	Male and female Long Evans rats	HFD: 58% kcal fat, 25.5% kcal carbohydrate, and 16.4% kcal protein (Open Source Diets D12331) v.s. CTL diet: 14% kcal fat, 64.8% kcal carbohydrate, and 21.2% kcal protein (Open Source Diets)	PN 21 to PN 84-105	Adulthood PN 84-105+	Spatial Object Recognition	HFD impaired spatial memory in both males and females.
		Valladolid-Acebes et al., 2011	Male C57BL/6J mice (CRIFA, Barcelona, Spain)	HFD: 45 kcal% fat, 35 kcal% carbohydrates and 20 kcal% protein (Research Diets D12451) or CTL diet: 10 kcal% fat, 70 kcal% carbohydrates and 20 kcal% protein (Research Diets D12450B)	PN 35-91 followed by food restriction with the same diet	Adulthood	Radial Arm Maze	Spatial memory acquisition and retention was impaired in HFD mice
		Valladolid-Acebes et al., 2013	Male C57BL/6J mice (CRIFA, Barcelona, Spain)	HFD: 45 kcal% fat, 35 kcal% carbohydrates and 20 kcal% protein (Test Diet Limited BCM IPS Ltd, UK D12451) or CTL diet: standard chow (details not specified)	Adolescent group: PN 35-91 followed with/without food restriction with the same diet Adult group: PN 56-112	Adulthood	NOL	HFD during adolescence, but not adulthood, impaired object location memory, regardless of caloric restriction.
		Vega-Torres et al., 2018	Male Lewis rats Charles River Laboratories (Portage, MI, USA)	HFD: 41% kcal fat, Bio-Serv, Frenchtown, NJ, USA or CTL diet: 13% kcal fat, based on AIN-93G formulation from Bio-Serv Frenchtown, NJ, USA	PN 28-110	Adulthood PN 88+	Acoustic startle reflex Fear-potentiated startle	Western diet rats had reduced latencies for acoustic startle responses relative to CTLs. Fear-potentiated startle acquisition and fear extinction in both groups but to a lesser degree in WD-fed rats.
		Vega-Torres et al., 2020	Male Lewis rats (Charles River, USA)	Western diet (WD): 16% kcal protein, 41% kcal fat and 41% kcal carbohydrate; Bio-Serv F7462; Frenchtown, NJ, USA or CTL diet: 19% kcal protein, 13% kcal fat and 68% kcal carbohydrate; Bio-Serv F7463; Frenchtown, NJ, USA	Adolescent group: PN 31-44 Adult group: PN 81-94	Adolescence or adulthood PN 38-42 or PN 88-92	Acoustic startle reflex (ASR) Fear-potentiated startle (FPS)	No difference in fear condioning, but impaired fear extinction (and greater background anxiety post extinction) in adolescence on WD.
		Vinuesa et al., 2016	Male C57BL/6J Mice (Jackson Laboratories, Bar Harbor, ME)	HFD: 3.9 kcal/g energy; carbohydrate 22.5%, proteins 22.8%, fat 21.1%, fibers 23.0%, minerals 5.6% and humidity 5.0%. The main fat components of HFD pellets were monounsaturated fatty acids (44.7%), saturated fatty acids (29.8%) and polyunsaturated fatty acids (20.9%) Gepsa Feeds (Grupo Pilar, Pilar, Buenos Aires, Argentina or CTL diet: 2.5 kcal/g energy (carbohydrate 28.8%, proteins 25.5%, fat 3…	PN 28-140	Adulthood PN 140	NOL Y-maze	HFD mice had impaired spatial memory in both the NOL and Y-maze tasks
		Vinuesa et al., 2019	Male C57BL/6J Mice (Jackson Laboratories, Bar Harbor, ME)	HFD: 3.9 kcal/g energy; carbohydrate 22.5%, proteins 22.8%, fat 21.1%, fibers 23.0%, minerals 5.6% and humidity 5.0%. The main fat components of HFD pellets were monounsaturated fatty acids (44.7%), saturated fatty acids (29.8%) and polyunsaturated fatty acids (20.9%) Gepsa Feeds (Grupo Pilar, Pilar, Buenos Aires, Argentina or CTL diet: 2.5 kcal/g energy (carbohydrate 28.8%, proteins 25.5%, fat 3…	PN 21-60	Adolescence PN 53	NOL	HFD mice had impaired spatial memory
	Reward-motivated behavior	Blanco-Gandía et al., 2017	OF1 and CD1 Male Mice Charles River (Barcelona, Spain)	HFD: (TD.06415, 45 Kcal % fat, 36 Kcal % carbohydrates and 19% Kcal protein; 4,6 kcal/g) or CTL diet: Teklad Global Diet 2014, 13 Kcal % fat, 67 Kcal % carbohydrates and 20% Kcal protein; 2,9 kcal/g) Both diets supplied by Harlan Laboratories Models, S. L. (Barcelona, Spain)	PN 29-69 (40 days, Binge model: 2 hours a day 3x a week). HFD rats further subdivided into three groups at PN 69: a) HFD throughout the study b) HFD up until behavioral testing c) HFD removed 15 days before behavioral testing	Adulthood PN 69+	CPP using the OF1 strain (i.p. injection with 1 mg/kg (subthreshold dose) or 6 mg/kg of cocaine hydrochloride diluted in physiological saline) Intravenous self-administration paradigm using the CD1 strain with 0.5 mg/kg/ cocaine infusion diluted in sterile 0.9% physiological saline in a volume of 20 ml	HFD animals kept on a binge diet throughout the study were more sensitive to the reinforcing effects of a subthreshold dose of cocaine and HFD rats that had their HFD removed for 15 days prior to testing were more vulnerable to the reinstatement of CPP. Rats that had access to HFD from PN 29-68 displayed increased cocaine self administration. After being re-exposed to HFD from PN 108-114, rats in…
		Carlin et al., 2016	Male and female offspring of C57BL/6J female mice bred with DBA/2J male mice (in-house breeding colony)	HFD (Test Diet, #58G9; 18% protein, 60% fat, and 20.5% carbohydrate) or CTL diet: Test Diet, Richmond, IN #5755; 18.5% protein, 12% fat, 69.5% carbohydrate	a) Adolescent-onset HFD: HFD from PN 21-105, followed by CTL diet from PN 106-133 b) Adult-onset HFD: HFD from PN 42-126 followed by CTL diet from PN 127-154 c) CTL group: standard chow after weaning (PN 21)	Adulthood	Sucrose Preference (2 bottle choice test-200 ml of 4% sucrose solution (w/v) or 200 ml of tap water) and Binging behavior with one-hour palatable food intake for 8 days	Adolescent-onset and adult-onset HFD female mice displayed reduced preference for 4% sucrose, whereas only adolescent-onset HFD male mice displayed reduced preference for 4% sucrose with no differences in the male HFD adult-onset group, suggesting anhedonia and a hypo-reward response. After 4 weeks on a CTL diet, the HFD groups no longer showed a reduced preference for sucrose compared to CTLs. O…
		Clasen et al., 2020	Male Sprague Dawley rats	HFD: 21% kcal from protein, 40% kcal from fat (majority lard)and 39% kcal from carbohydrates (including 23% kcal from refined sugar) TD10768, Envigo RMS, Indianapolis, IN, USA or CTL diet: 25% kcal from protein, 17% kcal from fat and 58% kcal from carbohydrates; Teklad 7012, Envigo RMS, Indianapolis, IN	PN 21-102 Rats were water restricted to 20min/day from PN 77-102	Adulthood PN 77-102	CPP and CTA for cocaine(0, 18 and 32mg/kg, ip) and saccharine solution (0.1% wt/vol)	No difference in CPP nor CTA
		Frazier et al. 2008	Male and female C57BL/6 mice (Jackson Laboratories, Ben Harbor)	Sugar diet: ad lib access to 20 mg sucrose pellets (Bio-Serv, Frenchtown, NJ) or CTL diet: Standard chow (details not specified)	CTL group: standard chow throughout experiment Sugar group: sucrose exposure from PN 21 to PN 49-70; followed by standard chow afterwards	Adulthood PR+Sucrose preference (PN 105) High-sugar/high-fat challenge (PN 203)	PR Sucrose preference over water and extinction High-Sugar/High-Fat Dietary Challenge	Unlimited access to sucrose early in life reduced sucrose-seeking in PR. There were no group differences in sucrose preference or in the amount of food consumed with the high-sugar, high-fat dietary challenge.
		Gueye et al., 2018	Male Wistar rats (Charles River)	5% sucrose solution (free access) + CTL diet or CTL diet: 16.5% protein, 3% fat and 59% carbohydrate	PN 30-46 (sucrose) ***Daily ip injections of imipramine or saline (PN 47-274) in another cohort	Adulthood PN 60+	Sucrose preference (2 bottle choice test- 1% sucrose solution (w/v) or tap water) and Operant responding in a PR3 for saccharin (0.1mL of 0.13% w/v solution)	Sucrose rats had reduced sucrose preference and operant responding for saccharin
		Kendig et al., 2013	Male Hooded Wistar rats (Lab Animal Services at the University of Adelaide)	Sugar group: Specialty Feeds®, 3.4 kcal/g; 20% protein, 4% fat,60% carbohydrate and tap water in home cage; 10% w/v sucrose solution approx. 0.4 kcal/g (CSR® white sugar; Victoria, Australia) in experimental cage or CTL group: Specialty Feeds®, 3.4 kcal/g; 20% protein, 4% fat,60% carbohydrate and tap water in home cage; 0.1% sodium saccharin solution (Sigma, Missouri, USA) in experimental cage	Intermittent sucrose or sodium saccharin access for 2 hr/day from PN 28–55 (adolescent group) PN 63–91 (adult group)	Adulthood PN 61 (adolescent group) or PN 96 (adult group)	Instrumental training (variable interval) for grain-based pellet (Bioserv F0165) and Outcome devaluation	No difference in lever pressing for instrumental acquisition. Neither adolescent groups displayed significant outcome devaluation. In those exposed to sucrose during adulthood, sucrose exposure dampened devaluation.
		Naneix et al., 2017	Male Long-Evans rats (RRID:RGD_60991; Janvier)	HFD: 45% kcal fat, 20% kcal protein, and 35% kcal carbohydrates (D12451, Research Diets) or CTL diet: 8% kcal fat, 19% kcal protein, and 73% kcal carbohydrates (A04, SAFE)	PN 21 - PN 110-120	Adulthood	Locomotor activity and sensitization to amphetamine	Chronic HFD exposure led to increased locomotor sensitization to amphetamine
		Naneix et al., 2016	Male Wistar rats (Charles River Laboratories, France)	Sugar diet: 5% w/v sucrose, water, and standard chow (A04; Scientific Animal Food & Engineering, France) or CTL diet: standard chow and water	PN 30-46	Adulthood PN 70+	Two bottle test (water or 0.13% w/v saccharin solution; water or 5% w/v sucrose solution) and taste reactivity (to water, quinine 0.1%, sucrose 5% and saccharine 0.13%)	Sucrose-exposed rats had reduced intake of either saccharin or sucrose during two-bottle choice tests. Sucrose-exposed rats presented a decrease in positive ‘liking’ orofacial reactions to sucrose or saccharin compared to CTLs.
		Naneix et al., 2018	Male Wister Han rats (Charles River, France)	Sugar diet: CTL diet + 5% w/v sucrose solution or CTL diet: Ad libitum access to standard chow (A04, Scientific Animal Food & Engineering, France) and water	PN 30-46	Adulthood PN 70+	Operant responding for 0.1mL of 0.13% w/v saccharin solution; breakpoint measure in PR following ip injections of D1R and D2R agonist/antagonist	CTL animals had increased lever pressing during acquisition (FR5). Low-dose D1R agonist increased lever pressing in CTL but not sucrose rats (no difference in basal breakpoint). Sucrose rats were less sensitivte to the impact of D1R antagonism on breakpoint (response only at highest dose). Similar observations for D2R agonists and antagonist. No diet effect on locomotor response.
		Privitera et al., 2011	Male Sprague-Dawley rats (Charles River Laboratories, Kingston, New York)	HFD: 60% kcal fat; Research Diet, Formula D12492) or CTL diet: 10% kcal fat; Research Diet, Formula D12450B	Adolescence: HFD or CTL diet from PN 21-40 (20 days) or Adulthood: HFD from PN 61-80	Adulthood from PN 61-62 (subset of adolescent group only) or PN 101-102 (subset of adolescent group and adult group)	CPP for Cheetos® (56% kcal fat; Frito-Lay, Inc., Plano, TX	The adolescent groups that were tested from PN 61-62 and PN 101-102 were impaired in the CPP test, despite consuming the most HF Cheetos® during training.
		Rabasa et al., 2016	Male Sprague Dawley rats	High-fat/sugar diet (HFHS): CTL diet + [15.2% kcal from protein, 42% kcal from fat and 42.7% kcal from carbohydrates (high sucrose) TD88137, Harlan] or CTL diet: 22% kcal from protein, 12% kcal from fat and 66% kcal from carbohydrate; Teklad Global 16% protein diet, Harlan	Diets initiated at PN 22 and half high-fat/sugar diet rats switched to chow at PN 32. Diets maintained until adulthood PN 105	Adolescence: PN 31-43 and Adulthood: PN 67-101	CPP for chocolate pellets, sucrose (1% w/v) and (0.1%w/v) saccharin preference test, locomotor response to D2/3 agonism and food preference (chow vs high-fat/sugar diet; adulthood only)	high-fat/sugar rats decreased sucrose and saccharin preference at adolescence but not adulthood. No diet effect on CPP and locomotor response to D2/3 agonism at either time point. At adulthood, high-fat/sugar diet rats showed a weaker preference for high-fat/sugar diet over chow.
		Robertson & Rasmussen, 2017	Male Sprague Dawley rats (Simonsen, Gilroy, CA, USA)	CAF diet: chow diet + cooked sausages, cheesecake, potato chips, frosting, M&M and Twix or CTL Diet: standard chow (details not specified)	23h daily access from PN 21-77 (adolescent group) or PN 73-129 (adult group)	Adulthood PN 77 or PN 129	Instrumental training for grain-based pellet (Bioserv F0165) and Delay discounting (1 pellet or later larger reward of 3 pellets) under basal conditions and following ip injection of haloperidol (0.03, 0.1 and 0.3mg/kg)	CAF diet did not influence delay discouting in both adolescents and adults, however, CAF rats, regardless of age group were more sensitive to the preference for smaller, immediate reward induced by D2R antagonism.
		Steele et al., 2019	Male Sprague Dawley rats (Charles River, Portage, MI)	Note: all rats received access to same amount of calories per day: 50 calories during week 1, 60 calories during week 2, 80 calories during week 3, and 100 calories from week 4 until the end of experimentation Groups: HFD: 60% of the calories from chow and 40% of the calories from hydrogenated vegetable fat (9.3kcal/g) or High-sugar Diet: 60% of the calories from chow and 40% of the calories from…	PN 24 -PN 80-84	Adulthood PN 80-84+	Impulsive Choice Discrimination abilities Incentive Motivation Preference Test Taste Reactivity	HFD group had increased delay sensitivity, were impaired at the reward magnitude manipulation task, and showed deficits in time discrimination. The sugar group had increased delay sensitivity. HFD and high-sugar groups did not significantly differ in hedonic responding (i.e., liking) to fat or sugar, but the HFD group showed an increased preference for fat. The sugar and CTL group preferred sugar.
		Tantot et al., 2017	Male Long-Evans rats (Janvier, France)	HFD: 45% kcal fat, 20% kcal protein, and 35% kcal carbohydrates (D12451, Research Diets) or CTL diet: 8% kcal fat, 19% kcal protein, and 73% kcal carbohydrates (A04, SAFE)	PN 21 - PN 84-168	Adulthood PN 84-168	PR/ Outcome devaluation test Reinforcers: grain pellets, sucrose pellets or 20% sucrose solution	HFD rats displayed reduced instrumental performance and a lower break point in PR when trained on a random interval, but not random ratio, schedule of reinforcement. HFD rats trained on interval schedules also developed habitual food-seeking in the outcome devaluation test more quickly than rats on a CTL diet.
		Teegarden, Scott, and Bale 2009	Mice (C57Bl/6:129 in-house breeding colony; sex not specified)	HFD (4.73 kcal/g, 44.9% kcal fat, 35.1% kcal carbohydrate, and 20% kcal protein Research Diets, New Brunswick, NJ) or CTL diet: 4.00 kcal/g, 12% calories from fat, 60% calories from carbohydrate, and 28% calories from protein Purina Lab Diet, St. Louis, MO	HFD group (short-term exposure): HFD from PN 21-28, standard chow after CTL group: standard chow after weaning	Adulthood PN 84	Macronutrient Choice Preference (10 day exposure in the home cage to high carbohydrate diet containing 3.85 kcal/g consisting of 10% fat, 70% carbohydrate and 20% protein, high protein diet containing 4.29 kcal/g and consisted of 29.5% fat, 30.5% carbohydrate, and 40% protein or the same HFD used) and Adult chronic HFD exposure (15 weeks)	HFD-exposed mice preferred a diet high in fat in adulthood in the macronutrient choice test and consumed singificantly less of the high carbohydrate diet. However, there were no significant differences with chronic HFD exposure.
		Vendruscolo et al. 2010	Male Wistar rats (Charles River Laboratories, France)	Sucrose diet: 5% w/v sucrose, water and standard chow (Scientific Animal Food & Engineering, France; containing 16.5% protein, 59% carbohydrate and 3% fat) or Saccharin diet: 0.25% w/v saccharin solution, water, and standard chow or CTL diet: water and standard chow	Adolescence PN 30-46	Adulthood PN 60+	Fixed- and PR for saccharin, maltodextrin, or cocaine	Sucrose-exposed rats displayed reduced motivation for saccharin and maltodextrin, but not cocaine. Saccharin-exposed rats were tested for PR for saccharin only and showed reduced motivation to work for saccharin reward.
	Social Behavior	Ali et al., 2018	Male Wistar rats Charles River Laboratories (Québec, Canada)	HFD: 45% kcal from fat; 4.7 kcal/g, 23.3% fat, 17.3% protein, 47.6% carbohydrates, TD.08811, Harlan Laboratories, Madison, Wisconsin, USA or CTL diet: 3.4 kcal/g, 4.5% fat, 18.1% protein, 57.3% carbohydrate; Charles River Rodent Diet 5075, Agribrand Purina Canada, Woodstock, ON, Canada	PN 21-75/76 Early life stress (forced swim, elevated platform stress and restraint from PN 27-29)	Adulthood PN 56	Social Interaction Test	HFD attenuated anxiety-like behavior due to early life stress in the social interaction test
		Finger et al., 2011	Male C57BL/6J mice (Harlan, UK) and CD1 mice (aggressors)	C57BL/6J mice on HFD (45% kcal from fat) or CTL diet (10% kcal from fat, Research diets, USA) CD1 mice maintained on 2018S Teklad Global 18% Protein Rodent Diet	PN 21-105	Adulthood PN 119	Social interaction test after 19 days of social defeat stress to observe social avoidance behavior	No effect of diet on social avoidance
		Fülling et al., 2020	C57BL/6JOlaHsd male mice (Envigo, UK)	HFD: 45% kcal (D12451, Research Diets) or CAF diet: various human food items - 36% energy as fat, 50% as carbohydrate and 14% as protein on average or CTL diet: Teklad Global 18% Protein Rodent Diet (2018S, Envigo, UK)	PN 28-49, then switched to standard chow	Adulthood PN 73+	Three-Chamber social interaction task	No effect of diet on social behavior
		Gancheva et al., 2017	Male Wistar rats (Vivarium of Varna Medical University)	HFD: chow with 20% w/w lard (45% kcal from lard) + 10% fructose drinking solution or High fat/high fructose: chow with 17% w/w lard a(38% kcal from lard) nd 17% w/w fructose (20% kcal fructose) + 10% fructose drinking solution or CTL diet: 29% kcal protein, 10% kcal fat and 61% kcal carbohydrate; TopMix	PN 42-98	Adulthood PN 98	Social interaction test	HFD, but not high fat/high fructose diet, reduced social interaction time
		Gueye et al., 2018	Male Wistar rats (Charles River)	CTL diet + free access to a 5% sucrose solution or CTL diet: 16.5% protein, 3% fat and 59% carbohydrate	PN 30-46 (sucrose) ***Daily ip injections of imipramine or saline (PN 47-274) in another cohort	Adulthood PN 232	Social interaction	No effect of sucrose solution on social interaction
		Lalanza et al., 2014	Male & female Sprague-Dawley rats (bred at Universitat de Barcelona)	CAF Diet: 10% proteins; 41% fat; and 49% carbohydrates or CTL diet: 24% protein, 18% fat and 58% carbohydrates; Harlan, Barcelona, Spain	PN 21-77 weeks	Adulthood PN 70-77	Social Interaction Test	CAF diet increased social interaction
		MacKay et al., 2017	Male Sprague Dawley rats (intruders) and Long Evans rats (residents) (Charles River; Quebec, Canada)	CTL diet + 4 hr access to 45% kcal fat pellet (TD.08811, Harlan Laboratories, Madison, Wisconsin, USA) or CTL diet: 3.4 kcal/g, 4.5% fat, 18.1% protein, 57.3% carbohydrate, Charles River Rodent Diet 5075	PN 21-84	Adolescence PN 28–34 (social defeat paradigm) Adulthood PN 63 (social interaction test)	Resident-intruder interactions during social defeat paradigm and social interaction test	Rats with palatable diet access were less submissive during social defeat testing as juveniles, and showed increased social interaction as adults.
		Reichelt et al., 2019	Male Sprague Dawley rats (Animal Resources Centre, Western Australia)	CTL diet + 2h/day access to High-fat/high-sugar diet: 9% kcal from protein, 36% kcal from fat (lard) and 55% kcal from sucrose; SP04-025, Gordon's Specialty Stockfeeds, Australia or CTL diet: 23% kcal from protein, 12%kcal from fat and 65% kcal from carbohydrate; Gordon's Specialty Stockfeeds, Australia	PN 28-56	Adolescence PN 50	Social recognition	Both chow and high-fat/high-sugar diet rats showed preference for novel rat over empty cage, but only high-fat/high-sugar rats had impaired social recognition memory when tested with a novel rat and familiar rat
		Reichelt et al., 2020	Male Sprague Dawley rats (Animal Resources Centre, Western Australia)	CTL diet + 2h/day access to High-fat/high-sugar diet: 9% kcal from protein, 36% kcal from fat (lard) and 55% kcal from sucrose; SP04-025, Gordon's Specialty Stockfeeds, Australia or CTL diet: 23% kcal from protein, 12%kcal from fat and 65% kcal from carbohydrate; Gordon's Specialty Stockfeeds, Australia	PN 28-56	Adolescence PN 42+	Social interaction (pre/post HFS), social recognition and social odour preference	High-fat/high-sugar rats reduced social interaction and had impaired social memory (no preference for novel over familiar rat), however HFHS diet had no impact on social odour preference.
		Yang et al., 2020	C57Bl6J male mice (Chengdu DaShuo Experimental Animal Company (Chengdu, China))	HFD: 20% kcal from protein, 60% kcal from fat and 20% kcal from carbohydrate; DIO Series Diet, #H10060, Beijing HFK Bioscience Co., Ltd or CTL diet: DIO Series Diet, #1025, Beijing HFK Bioscience Co., Ltd	PN 21-70	Adulthood PN 63+	3-chamber social test; reciprocal social interaction and ultrasonic vocalization upon female presentation	HFD impaired sociability and social novelty in the 3-chamber social test, reduced reciprocal interaction time and increased immobility. HFD mice also made fewer calls upon female presentation.
		Yaseen et al., 2019	Male Sprague Dawley rats (bred at Haifa University animal facilities)	HFD: 20% protein, 20% carbohydrates [6.8% sucrose], 60% fat or CTL diet: 16.4% protein, 4% fat, 60% carbohydrate [5% sucrose], ENVIGO, Israel	PN 20-21 to PN 27-29	Adolescence PN 27+	Social Recognition Test	HFD impaired social preference memory, but could be rescued with an injection of the OXY specific agonist [Thr4,Gly7]-oxytocin in the mPFC or a systemic oxytocin injection
		Zilkha et al., 2017	BTBR T+tf/J male mice (The Jackson Laboratory, Bar Harbor, ME, USA) or C57BL/6JOlaHsd (C57) male mice (Harlan Laboratories (Rehovot, Israel). Unfamiliar mice were 5-week-old Hsd:ICR[CD-1] males (Harlan Laboratories).	HFD: 60% kcal as fat, 20% kcal as protein (D12492, Research Diets, New Brunswick, NJ, USA) or CTL diet: 10% of kcal as fat, 20% kcal as protein, (D12450B, Research Diets, New Brunswick, NJ, USA)	PN 24+	Adulthood PN 70-91	Three-chamber social assay	BTBR mice on a HFD had impaired social memory in the social-novelty preference test, but C57 mice did not.
